# Supplementary material for: Impact of a Multidisciplinary Culture Follow-up Program of Antimicrobial Therapy in the Emergency Department
Source: Springer Nature journal article supplement (doi:10.1007/s40121-014-0026-x), 2014-04-28
Supplement: MOESM1 [file 9339616]

- Antimicrobial stewardship in the emergency department (ED) is an important service that pharmacists can provide and enhance.
- Culture follow-up (CFU) programs have been proposed as a quality improvement strategy to increase appropriate antimicrobial use in patients discharged from ED.
- This single center, quasi-experimental study of a pharmacist-led CFU program for bloodstream and urinary tract infections demonstrated that approximately one-fourth of patients discharged from the ED required modification of antimicrobial therapy.
- A systematic process for CFU in the emergency department improved transition of care and was associated with fewer ED revisits and hospital admissions.

This summary slide represents the opinions of the authors. Sponsorship for this study was funded by a residency research award from the American Society of Health System Pharmacists (ASHP) Research and Education Foundation (Bethesda, Maryland, USA). For a full list of acknowledgments and conflicts of interest for all authors of this article, please see the full text online. Copyright © The Authors 2014. Creative Commons Attribution Noncommercial License (CC BY-NC).
